# Supplementary figures and images for: Associations Between Antiretroviral Treatment and Avascular Bone Necrosis: The Swiss HIV Cohort Study
Source: PubMed Central journal article supplement — Open Forum Infect Dis. 2017 Aug 22;4(4):ofx177. doi: 10.1093/ofid/ofx177 (PMC5632527; doi:10.1093/ofid/ofx177), 2017-08-22

Supplementary Figure 1:

Panel A) Selection of cases

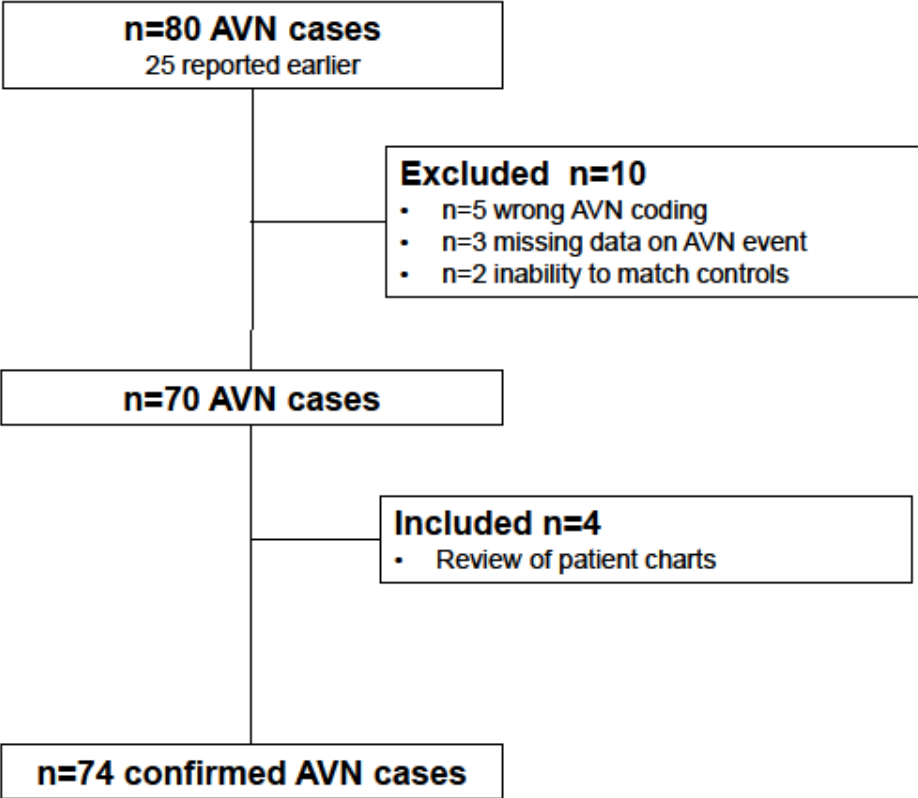

Panel B) Selection of controls

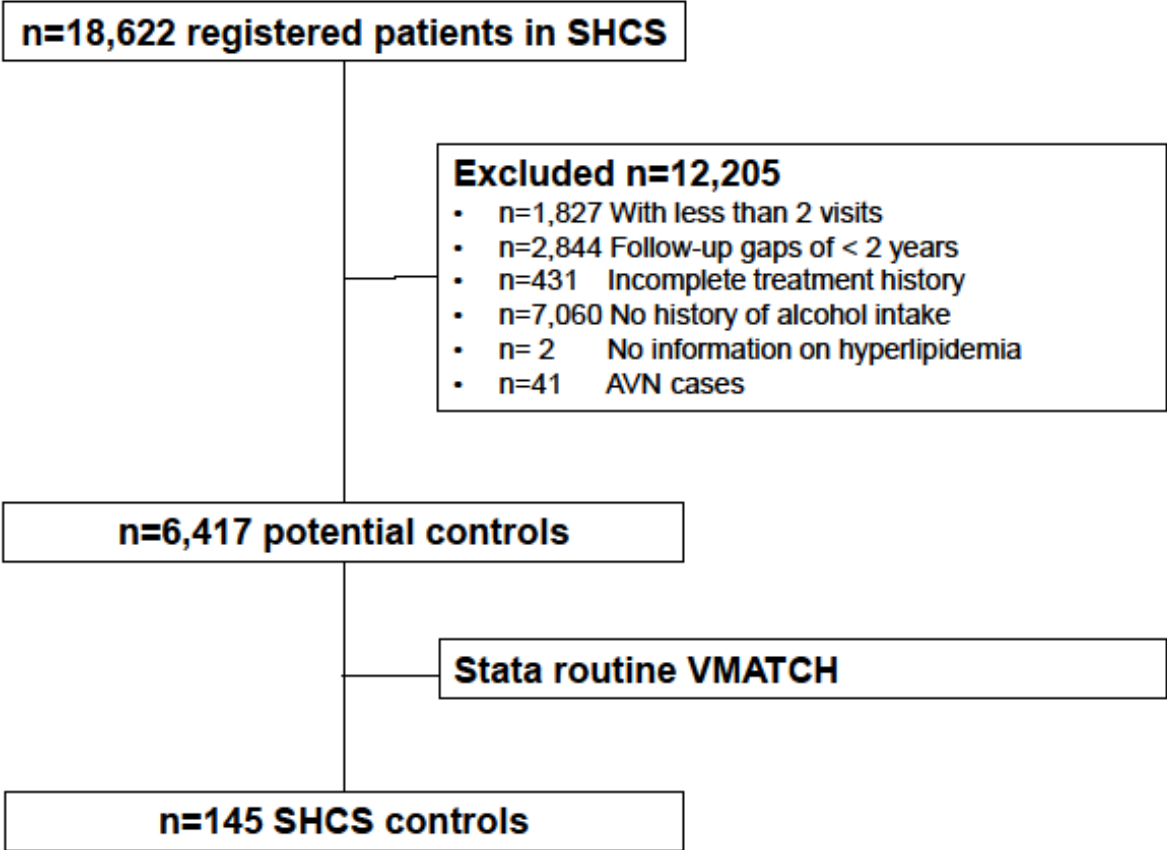

Supplement: ofx177_suppl_supplementary_figure_1.pdf [file ofx177_suppl_supplementary_figure_1.pdf]
